# Supplementary material for: Can Sierra Leone maintain the equitable delivery of their Free Health Care Initiative? The case for more contextualised interventions: results of a cross-sectional survey
Source: Springer Nature journal article supplement (doi:10.1186/s12913-016-1496-1), 2016-07-13
Supplement: MOESM1 [file 10370664]

**HOUSEHOLD REGISTER**

|                                    |
|------------------------------------|
| Survey Number _____                |
| Name of CHW member: _____          |
| RC Present _____                   |
| Referral (give reason) _____       |
| # of People in the Household _____ |
| Supervisor _____                   |

|                                                                                                                                                                                       |                                           |
|---------------------------------------------------------------------------------------------------------------------------------------------------------------------------------------|-------------------------------------------|
| Village _____ Circle: KKS or JONG or IMPERI or SHERBRO                                                                                                                                | Name of Person completing interview _____ |
| Reporting Period (Date) _____                                                                                                                                                         | Head of Household _____                   |
| Nearest Health Centre: _____ Score: 1 (very poor) 2 3 4 5 (excellent)                                                                                                                 |                                           |
| Is the respondent aware of any community case management programme active in the area? YES or NO.<br>If yes, which of the following services do they provide (Circle all that apply): |                                           |
| MALARIA    DIARRHEA    ACUTE RESPIRATORY INFECTIONS                                                                                                                                   |                                           |
| Please write the number of women in this household who have died within 40 days of giving birth in the last year: _____                                                               |                                           |

**Adults & Children Above 5**

| GENERAL INFO: Adults                                |     |   |           |                     |             |                  | PREGNANCY          |           |              |                |            |   |   |   |         |               |        |           |                 | MALARIA                      |                        | NUTRITION        |                            |                      |                   |                    |         | DANGER SIGNS |        |       |                          |                         |                  | FP                         |                          |                |               |                  |                  |           |  |  |  |
|-----------------------------------------------------|-----|---|-----------|---------------------|-------------|------------------|--------------------|-----------|--------------|----------------|------------|---|---|---|---------|---------------|--------|-----------|-----------------|------------------------------|------------------------|------------------|----------------------------|----------------------|-------------------|--------------------|---------|--------------|--------|-------|--------------------------|-------------------------|------------------|----------------------------|--------------------------|----------------|---------------|------------------|------------------|-----------|--|--|--|
| Q1                                                  | Q2  |   | Q3        | Q4                  | Q5          | Q6               | Q7                 | Q8        | Q9           | Q10            | Q11        |   |   |   | Q12     | Q13           | Q14    | Q15       | Q16             | Q17                          | Q18                    | Q19              | Q20                        | Q21                  | Q22               | Q23                |         |              |        | Q24   | Q25                      | Q26                     | Q27              | Q28                        | Q28b                     | Q28c           | Q28d          | Q29              | 29a              |           |  |  |  |
| Household Members (HHH & Women of Childbearing Age) | Sex |   | Age (yrs) | Relationship to HHH | Disability? | Source of Income | Level of Education | Pregnant? | Health Card? | Delivery Month | ANC Visits |   |   |   | TT dose | Ferrous/Folic | IPT/SP | Dewormed? | Access to PMTCT | Received HIV info during ANC | Tested as part of ANC? | Received Results | Slept under ITN last night | Does net have holes? | # Meals Yesterday | Cereals & Starches | Protein | Legumes      | Greens | Fruit | # Pregnancy Danger signs | # Neonatal Danger Signs | # Methods of MTC | # Post Partum Danger signs | # Pneumonia Danger signs | Cause of Polio | Cause Malaria | Cause of Measles | Family Planning? | FP Method |  |  |  |
|                                                     | M   | F |           |                     |             |                  |                    |           |              |                | 1          | 2 | 3 | 4 |         |               |        |           |                 |                              |                        |                  |                            |                      |                   |                    |         |              |        |       |                          |                         |                  |                            |                          |                |               |                  |                  |           |  |  |  |
|                                                     |     |   |           |                     |             |                  |                    |           |              |                |            |   |   |   |         |               |        |           |                 |                              |                        |                  |                            |                      |                   |                    |         |              |        |       |                          |                         |                  |                            |                          |                |               |                  |                  |           |  |  |  |
|                                                     |     |   |           |                     |             |                  |                    |           |              |                |            |   |   |   |         |               |        |           |                 |                              |                        |                  |                            |                      |                   |                    |         |              |        |       |                          |                         |                  |                            |                          |                |               |                  |                  |           |  |  |  |

RESPONDENT ONLY



Survey Number \_\_\_\_\_

| ICCM SICK PATIENT REGISTER FOR CHILDREN 5 YEARS AND BELOW |     |   |                        |           |                |       |           |                             |         |               |               |
|-----------------------------------------------------------|-----|---|------------------------|-----------|----------------|-------|-----------|-----------------------------|---------|---------------|---------------|
| GENERAL INFO                                              |     |   | PROBLEM (past 2 weeks) |           |                |       | TREATMENT |                             |         |               |               |
| Q58                                                       | Q59 |   | Q60                    | Q61       | Q62            | Q63   | Q64       | Q65                         | Q66     | Q67           | Q68           |
| Patient Name                                              | Sex |   | Age in months          | Diarrhoea | Fast Breathing | Cough | Fever     | Treated at HC within 24 hrs | ORS/ORT | Breastfeeding | Home Solution |
|                                                           | M   | F |                        |           |                |       |           |                             |         |               |               |
|                                                           |     |   |                        |           |                |       |           |                             |         |               |               |
|                                                           |     |   |                        |           |                |       |           |                             |         |               |               |
|                                                           |     |   |                        |           |                |       |           |                             |         |               |               |
|                                                           |     |   |                        |           |                |       |           |                             |         |               |               |
|                                                           |     |   |                        |           |                |       |           |                             |         |               |               |
|                                                           |     |   |                        |           |                |       |           |                             |         |               |               |
|                                                           |     |   |                        |           |                |       |           |                             |         |               |               |

| HOUSEHOLD                        |                  |                               |                 |                      |                     |
|----------------------------------|------------------|-------------------------------|-----------------|----------------------|---------------------|
| WATER AND SANITATION             |                  |                               |                 |                      |                     |
| Q69                              | Q70              | Q71                           | Q72             | Q73                  |                     |
| Time Spent Fetching Water (MINS) | # Litres per Day | How is the HH waste disposed? | Water Treatment | Before Eating        | After Changing Baby |
|                                  |                  |                               |                 | After Latrine        | Before Food Prep    |
|                                  |                  |                               |                 | Before Feeding Child |                     |
| <b>5 CRITICAL TIMES</b>          |                  |                               |                 |                      |                     |

# HOUSEHOLD: Water, Food and Sanitation

Find out if the household has unlimited access to the following methods to prevent sickness. Tick the boxes for the things the family has:

|                                                                                                                                                           |                                                                                                                                                         |                                                                                                                                              |                                                                                                                                                              |                                                                                                                                                   |                                                                                                                                               |                                                                                                                                                                                |
|-----------------------------------------------------------------------------------------------------------------------------------------------------------|---------------------------------------------------------------------------------------------------------------------------------------------------------|----------------------------------------------------------------------------------------------------------------------------------------------|--------------------------------------------------------------------------------------------------------------------------------------------------------------|---------------------------------------------------------------------------------------------------------------------------------------------------|-----------------------------------------------------------------------------------------------------------------------------------------------|--------------------------------------------------------------------------------------------------------------------------------------------------------------------------------|
| <p>Q74 <input type="checkbox"/></p> 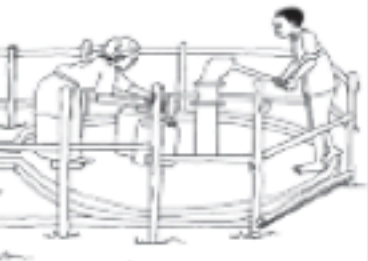 <p><b>Protected water source</b></p> | <p>Q75 <input type="checkbox"/></p>  <p><b>Safe drinking water</b></p> | <p>Q76 <input type="checkbox"/></p>  <p><b>Kitchen</b></p> | <p>Q77 <input type="checkbox"/></p>  <p><b>Drying rack for dishes</b></p> | <p>Q78 <input type="checkbox"/></p>  <p><b>Rubbish pit</b></p> | <p>Q79 <input type="checkbox"/></p>  <p><b>Latrine</b></p> | <p>Q80 <input type="checkbox"/></p>  <p><b>Hand-washing area with soap near latrine</b></p> |
|-----------------------------------------------------------------------------------------------------------------------------------------------------------|---------------------------------------------------------------------------------------------------------------------------------------------------------|----------------------------------------------------------------------------------------------------------------------------------------------|--------------------------------------------------------------------------------------------------------------------------------------------------------------|---------------------------------------------------------------------------------------------------------------------------------------------------|-----------------------------------------------------------------------------------------------------------------------------------------------|--------------------------------------------------------------------------------------------------------------------------------------------------------------------------------|

Follow up on anything the family is missing.

| LATRINE           |                 |                               |
|-------------------|-----------------|-------------------------------|
| Q81               | Q82             | Q83                           |
| Is Latrine Clean? | Type of Latrine | Where defecate if no latrine? |
|                   |                 |                               |
